# Supplementary material for: Boosted dehydrogenation of ethane over porous vanadium-based single crystals
Source: Royal Society of Chemistry journal article supplement (doi:10.1039/d1cy01250a), 2021-01-01
Supplement: d1cy01250a1.pdf [file d1cy01250a1.pdf]

## Boosted Dehydrogenation of Ethane in Porous Vanadium-based Single Crystals

Xiuyun Duan,<sup>ab</sup> Lingting Ye,<sup>\*acde</sup> and Kui Xie,<sup>\*abcde</sup>

<sup>a</sup> Key Laboratory of Design and Assembly of Functional Nanostructures, and Fujian Key Laboratory of Nanomaterials, Fujian Institute of Research on the Structure of Matter, Chinese Academy of Sciences, Fuzhou, Fujian 350002, China.

<sup>b</sup> University of Chinese Academy of Sciences, Beijing 100049, China.

<sup>c</sup> Key Laboratory of Optoelectronic Materials Chemistry and Physics, Fujian Institute of Research on the Structure of Matter, Chinese Academy of Sciences, Fuzhou, Fujian 350002, China.

<sup>d</sup> Fujian Science & Technology Innovation Laboratory for Optoelectronic Information of China, Fuzhou, Fujian 350108, China.

<sup>e</sup> Advanced Energy Science and Technology Guangdong Laboratory, 29 Sanxin North Road, Huizhou, Guangdong 116023, China.

\*Correspondence: [kxie@fjirsm.ac.cn](mailto:kxie@fjirsm.ac.cn)

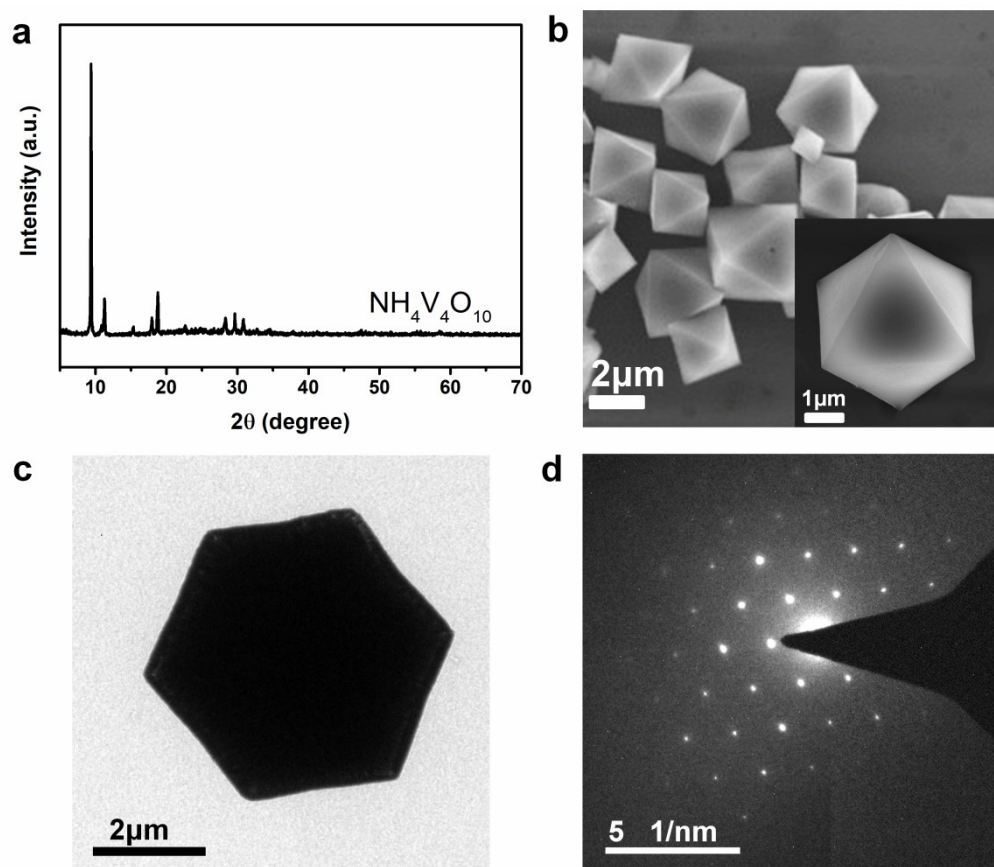

**Fig. S1** (a) XRD, (b) SEM, (c) TEM and (d) HR-TEM images of  $\text{NH}_4\text{V}_4\text{O}_{10}$  powder.

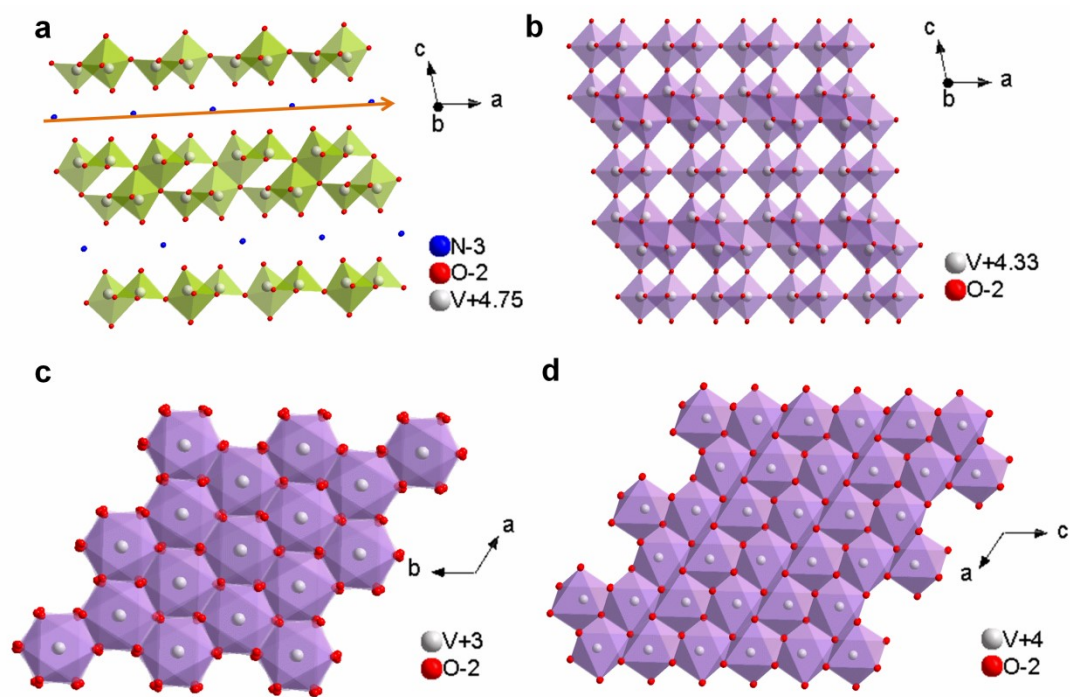

**Fig. S2** (a) The lattice channel of atomic evaporation of  $\text{NH}_4\text{V}_4\text{O}_{10}$  and the lattice structure of (b)  $\text{V}_6\text{O}_{13}$ , (c)  $\text{VO}_2$  and (d)  $\text{V}_2\text{O}_3$ .

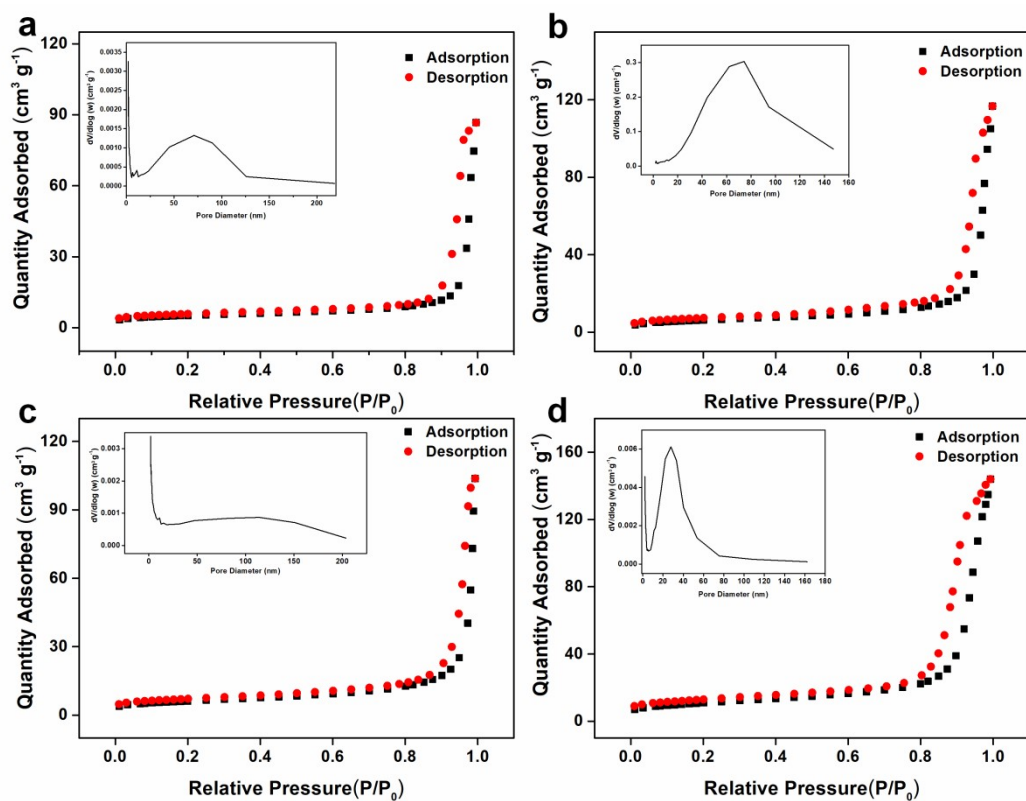

**Fig. S3** N<sub>2</sub> adsorption-desorption isotherms and (inset) the corresponding pore diameter distribution of porous single crystal micron particles, (a)  $V_6O_{13}$ , (b)  $VO_2$ , (c)  $V_2O_3$  and (d)  $VN$ .

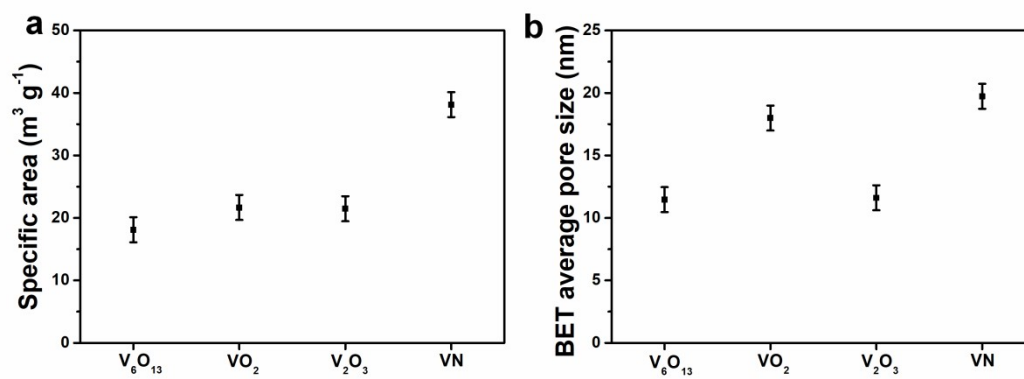

**Fig. S4** The surface specific area (a) and average pore size (b) of the porous single crystal micro particles (The error bar indicates the standard deviation in repeated measurements).

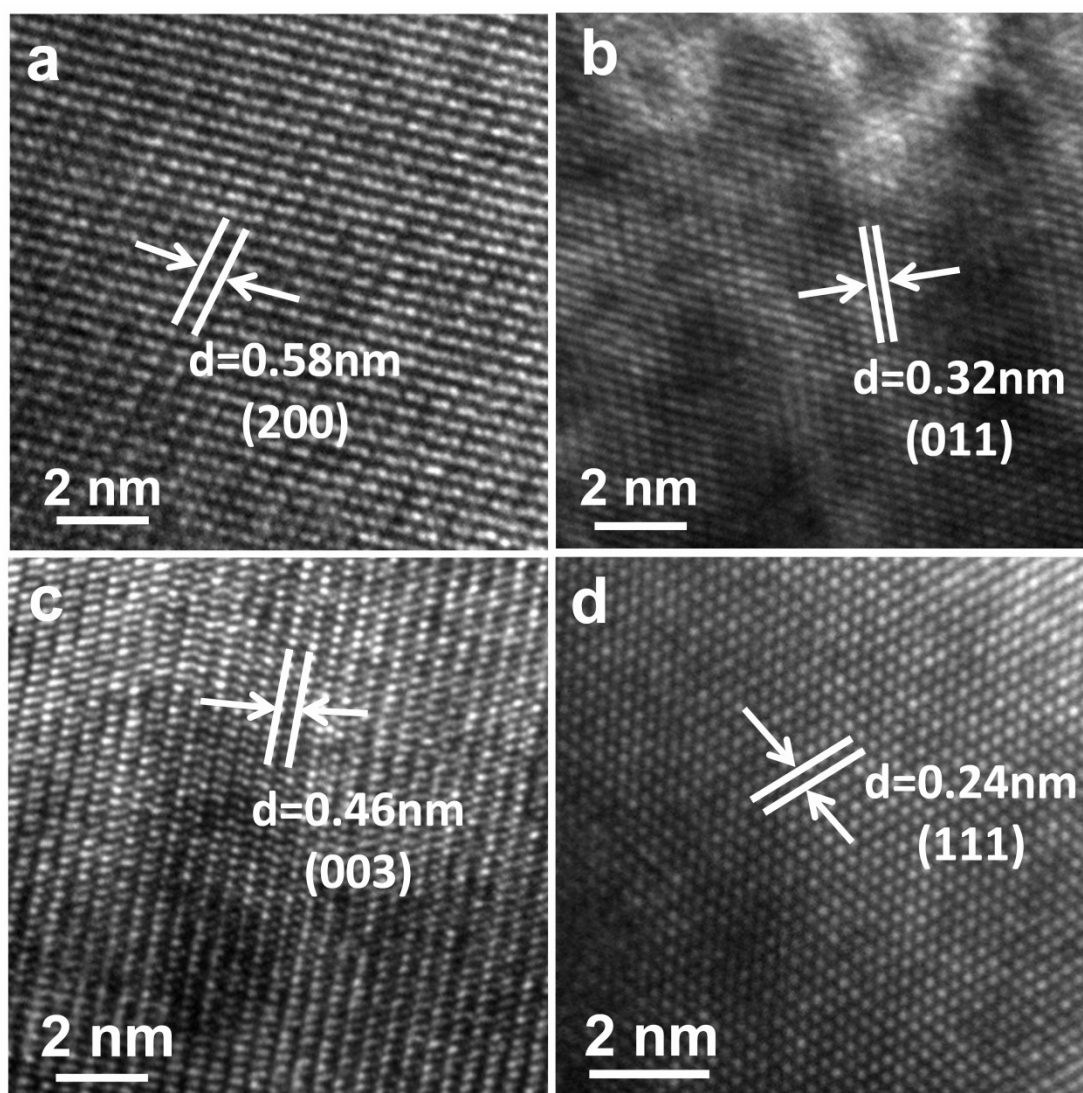

**Fig. S5** HR-TEM images of (a)  $V_6O_{13}$ , (b)  $VO_2$ , (c)  $V_2O_3$  and (d) VN porous single crystal micro particles.

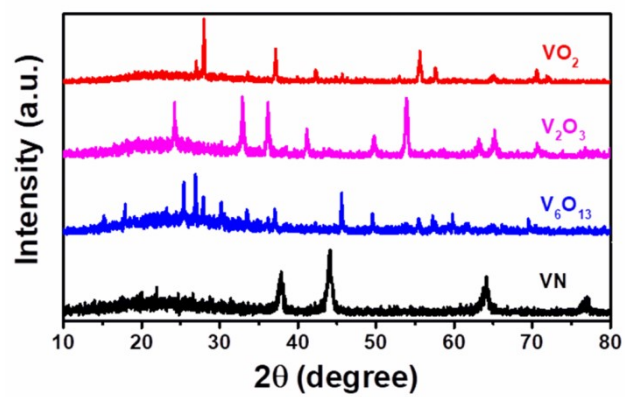

**Fig. S6** XRD of  $\text{V}_6\text{O}_{13}$ ,  $\text{VO}_2$ ,  $\text{V}_2\text{O}_3$  and  $\text{VN}$  single crystal powders after ethane dehydrogenation.

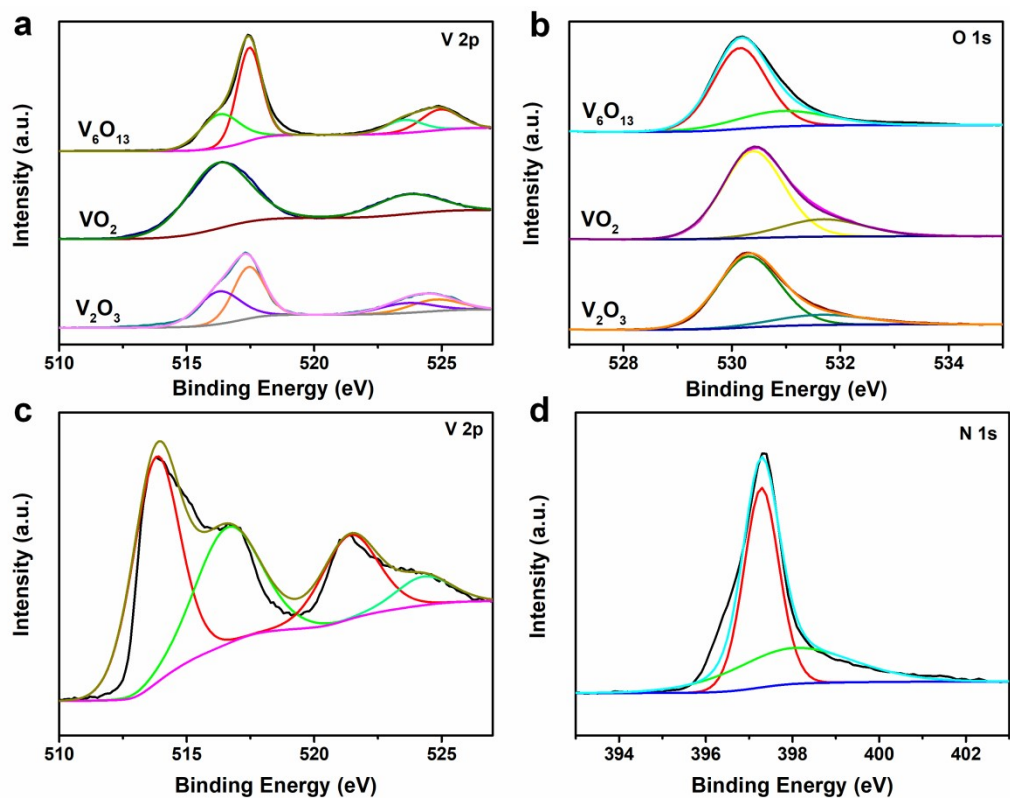

**Fig. S7** XPS spectra of PSC  $V_6O_{13}$ ,  $VO_2$ ,  $V_2O_3$  and VN powders after ethane dehydrogenation. (a) V 2p peaks of  $V_6O_{13}$ ,  $VO_2$  and  $V_2O_3$ . (b) O 1s peaks of  $V_6O_{13}$ ,  $VO_2$  and  $V_2O_3$ . (c) V 2p peaks of VN. (d) N 1s peaks of VN.



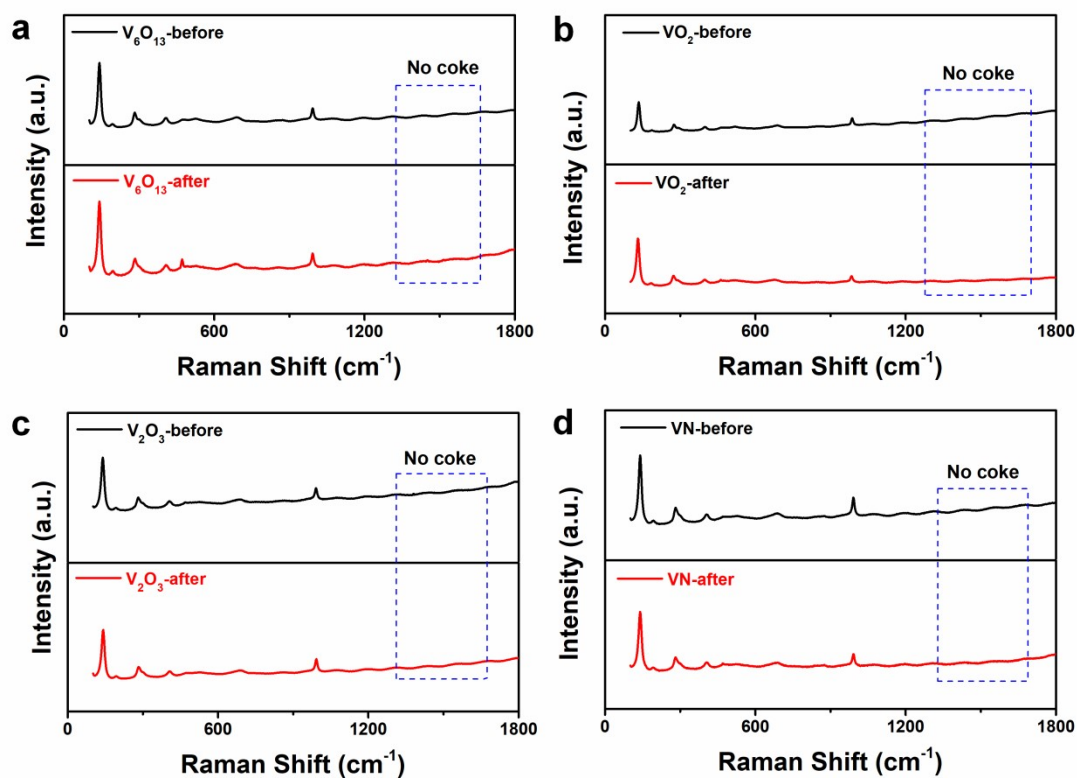

**Fig. S8** Raman images of (a)  $V_6O_{13}$ , (b)  $VO_2$ , (c)  $V_2O_3$  and (d) VN powders before (black line) and after (red line) the dehydrogenation of ethane reaction.

**Table S1** The ICP and EA results of vanadium-based materials.

| Samples                        | Contents of V (wt) | Contents of O or N (wt) |
|--------------------------------|--------------------|-------------------------|
| V <sub>6</sub> O <sub>13</sub> | 59.64%             | 10.62%                  |
| VO <sub>2</sub>                | 44.87%             | 20.06%                  |
| V <sub>2</sub> O <sub>3</sub>  | 58.02%             | 20.87%                  |
| VN                             | 74.82%             | 21.08%                  |
